# Supplementary material for: Interleukin-4 Supports the Suppressive Immune Responses Elicited by Regulatory T Cells
Source: PubMed Central journal article supplement (PMC5694475; doi:10.3389/fimmu.2017.01508), 2017-11-14
Supplement: data_sheet_1.pdf [file data_sheet_1.pdf]

## Supplementary Material

### Interleukin-4 supports the suppressive immune responses elicited by regulatory T cells

Wei-Cheng Yang, Yih-Shiou Hwang, Ying-Yu Chen, Chao-Lin Liu, Chia-Ning Shen, Wei-Hsin Hong, Sheng-Min Lo, Chia-Rui Shen\*

\* Correspondence: Chia-Rui Shen: crshen@mail.cgu.edu.tw

Supplementary figure

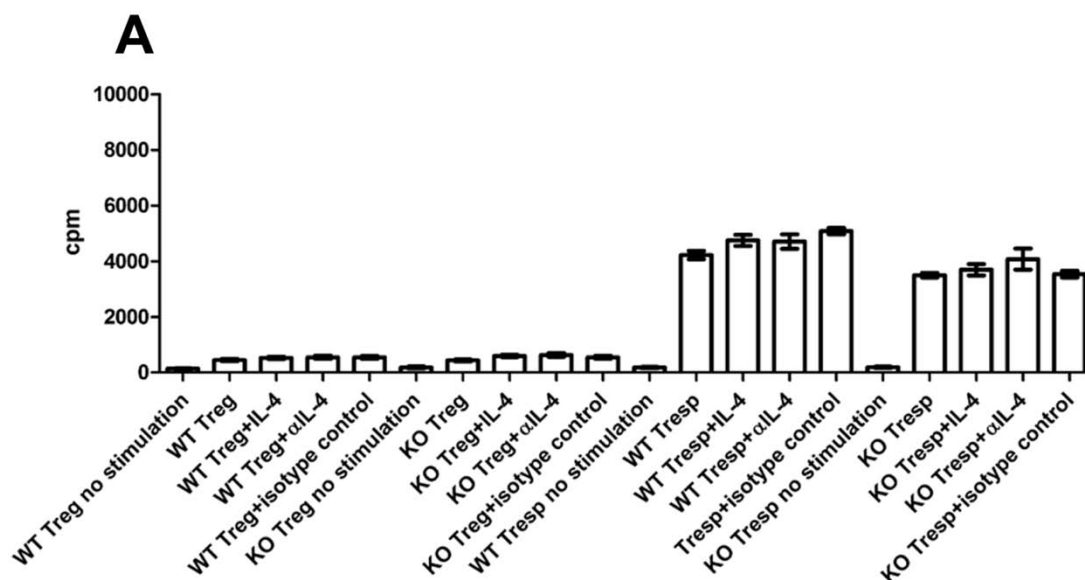

**Supplement Figure 1. Tregs and Tresp from WT and IL-4 KO mice demonstrated no significant differences in their proliferation profiles when they were stimulated alone under different experimental circumstances.**

(A)  $2 \times 10^5$  of Tregs or Tresp from WT or IL-4 KO were mixed with  $1 \times 10^5$  of irradiated total splenocytes as accessory cells and then activated by anti-CD3 plus anti-CD28 monoclonal antibodies for 3 days. The cell proliferation was determined by  $^3\text{H}$ -thymidine incorporation assay. Data are representative of three independent experiments.

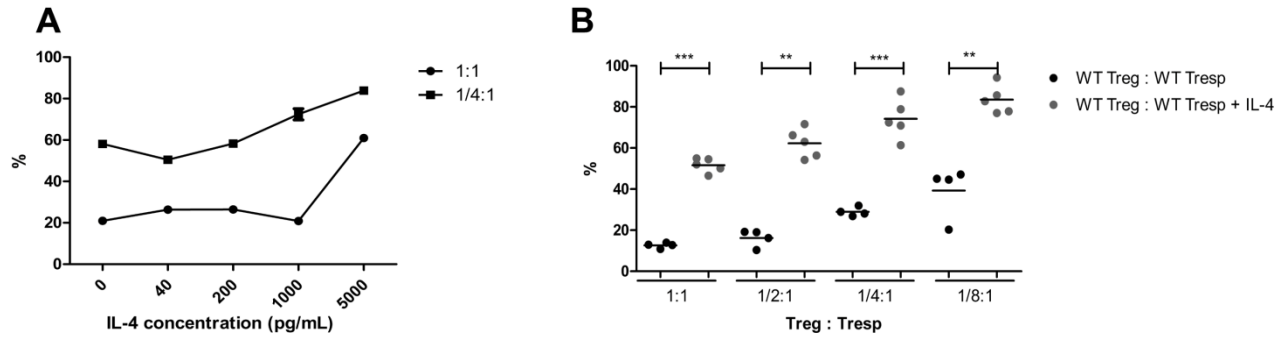

**Supplement Figure 2. High dose IL-4 supplement did not benefit IL-4 KO and WT Treg cells mediated immune suppression**

(A) IL-4 KO Treg cells mediated immune suppression was deteriorated when IL-4 was supplied at higher concentrations. (B) Supplement 10 ng/mL of IL-4 abrogated WT Treg cells mediated immune suppression. Results are presented as the relative percentage of cell proliferation to corresponding Tresps only. (\*,  $p < 0.05$ , \*\*,  $p < 0.01$ , \*\*\*,  $p < 0.001$ )
